# Supplementary material
Source: PubMed Central journal article supplement (PMC3542395)
Supplement: NIHMS428421-supplement-01.pdf [file NIHMS428421-supplement-01.pdf]

**Table S1. Strains Used in This Study, Related to Experimental Procedures**

| Name                 | Genotype                                                                             | Construction                                          | Reference/Source          |
|----------------------|--------------------------------------------------------------------------------------|-------------------------------------------------------|---------------------------|
| <i>C. crescentus</i> |                                                                                      |                                                       |                           |
| CB15N                | Synchronizable variant of wild-type strain CB15                                      |                                                       | Evinger & Agabian, 1977   |
| CS606                | CB15N $\Delta$ blaM                                                                  |                                                       | West et al., 2002         |
| EK61                 | CB15N P <sub>xyi</sub> ::P <sub>xyi</sub> -mcherry-CC1398                            |                                                       | Werner et al., 2009       |
| EK363                | CB15N P <sub>xyi</sub> ::P <sub>xyi</sub> -pstS-mcherry                              | Transformation of CB15N with pEK301                   | This work                 |
| EK389                | CB15N $\Delta$ stpAB P <sub>xyi</sub> ::P <sub>xyi</sub> -pstS-mcherry               | Transformation of SW51 with pEK301                    | This work                 |
| EK392                | CB15N P <sub>xyi</sub> ::P <sub>xyi</sub> -yfp                                       | Transformation of CB15N with pXYFPN-5                 | This work                 |
| EK393                | CB15N $\Delta$ stpAB P <sub>xyi</sub> ::P <sub>xyi</sub> -mcherry                    | Transformation of SW51 with pXCHYN-5                  | This work                 |
| EK416                | CB15N P <sub>xyi</sub> ::P <sub>xyi</sub> -mcherry                                   | Transformation of CB15N with pXCHYN-5                 | This work                 |
| EK417                | CB15N $\Delta$ stpAB P <sub>xyi</sub> ::P <sub>xyi</sub> -yfp                        | Transformation of SW51 with pXYFPN-5                  | This work                 |
| EK424                | CB15N pstS::miniTn5LacZ P <sub>xyi</sub> ::P <sub>xyi</sub> -pstS-mcherry            | Transformation of EK425 with pEK301                   | This work                 |
| EK425                | CB15N pstS::miniTn5LacZ                                                              | Transduction of kan <sup>R</sup> from YB2811          | This work                 |
| EK486                | CB15N $\Delta$ stpCD P <sub>xyi</sub> ::P <sub>xyi</sub> -yfp                        | Transformation of SS250 with pXYFPN-5                 | This work                 |
| EK487                | CB15N $\Delta$ stpCD P <sub>xyi</sub> ::P <sub>xyi</sub> -mcherry                    | Transformation of SS250 with pXCHYN-5                 | This work                 |
| GB255                | CB15N popZ:: $\Omega$                                                                |                                                       | Bowman et al., 2008       |
| JK5                  | CB15N $\Delta$ bacAB                                                                 |                                                       | Kühn et al., 2010         |
| MT304                | CB15N $\Delta$ pbpC                                                                  |                                                       | Kühn et al., 2010         |
| NR4042               | CB15N $\Delta$ stpX                                                                  |                                                       | Viollier, P. H. (unpubl.) |
| PV5064               | CB15N stpX::stpX-gfp                                                                 |                                                       | Hughes et al., 2010       |
| SS141                | CB15N $\Delta$ stpA P <sub>xyi</sub> ::P <sub>xyi</sub> -stpB-mcherry                | Transformation of SW49 with pSW32                     | This work                 |
| SS142                | CB15N $\Delta$ stpB P <sub>xyi</sub> ::P <sub>xyi</sub> -stpA-mcherry                | Transformation of SW50 with pSW35                     | This work                 |
| SS160                | CB15N stpB-mcherry                                                                   | Gene replacement in CB15N with pSS109                 | This work                 |
| SS165                | CB15N $\Delta$ bla P <sub>xyi</sub> ::P <sub>xyi</sub> -stpB-bla                     | Transformation of CS606 with pSS120                   | This work                 |
| SS167                | CB15N $\Delta$ pbpC P <sub>xyi</sub> ::P <sub>xyi</sub> -stpB-mcherry                | Transformation of MT304 with pSW32                    | This work                 |
| SS172                | CB15N $\Delta$ bla P <sub>xyi</sub> ::P <sub>xyi</sub> -stpA-bla                     | Transformation of CS606 with pSS119                   | This work                 |
| SS191                | CB15N ftsZ::P <sub>xyi</sub> -ftsZ P <sub>van</sub> ::P <sub>van</sub> -stpB-mcherry | Transformation of YB1585 with pSS142                  | This work                 |
| SS213                | CB15N $\Delta$ stpX P <sub>xyi</sub> ::P <sub>xyi</sub> -stpB-mcherry                | Transduction of kan <sup>R</sup> from SW30 to NR4042  | This work                 |
| SS214                | CB15N stpB::stpB-mcherry pP <sub>xyi</sub> -stpAB                                    | Transformation of SS160 with pSW64                    | This work                 |
| SS216                | CB15N $\Delta$ stpAB pP <sub>xyi</sub> -TAT-dimer2                                   | Transformation of SW51 with pEJ216                    | This work                 |
| SS220                | CB15N $\Delta$ stpA stpB::stpB-His                                                   | Transformation of SW49 with pSS187                    | This work                 |
| SS224                | CB15N divJ:: $\Omega$ P <sub>xyi</sub> ::P <sub>xyi</sub> -stpB-mcherry              | Transduction of spec <sup>R</sup> from YB3202 to SW30 | This work                 |
| SS228                | CB15N P <sub>xyi</sub> ::P <sub>xyi</sub> -stpC-mcherry                              | Transformation of CB15N with pSS204                   | This work                 |
| SS233                | CB15N stpB::stpB-His                                                                 | Transformation of CB15N with pSS187                   | This work                 |
| SS234                | CB15N $\Delta$ stpAB P <sub>xyi</sub> ::P <sub>xyi</sub> -stpD-gfp                   | Transformation of SW51 with pSS202                    | This work                 |
| SS236                | CB15N $\Delta$ stpAB P <sub>xyi</sub> ::P <sub>xyi</sub> -stpC-mcherry               | Transformation of SW51 with pSS204                    | This work                 |
| SS239                | CB15N $\Delta$ stpC                                                                  | Gene replacement in CB15N using pSS209                | This work                 |
| SS240                | CB15N $\Delta$ stpC P <sub>xyi</sub> ::P <sub>xyi</sub> -stpD-gfp                    | Transformation of SS239 with pSS202                   | This work                 |
| SS243                | CB15N stpD::stpD-gfp P <sub>xyi</sub> ::P <sub>xyi</sub> -stpA-mcherry               | Transformation of SW33 with pSS205                    | This work                 |
| SS244                | CB15N stpD::stpD-His                                                                 | Transformation of CB15N with pSS206                   | This work                 |
| SS247                | CB15N stpC::stpC-His                                                                 | Transformation of CB15N with pSS210                   | This work                 |
| SS248                | CB15N stpD::stpD-gfp                                                                 | Transformation of CB15N with pSS205                   | This work                 |
| SS250                | CB15N $\Delta$ stpCD                                                                 | Gene replacement in SS239 using pSS208                | This work                 |
| SS252                | CB15N $\Delta$ stpD                                                                  | Gene replacement in CB15N using pSS208                | This work                 |
| SS258                | CB15N stpB::stpB-mcherry pBXMCS-2                                                    | Transformation of SS160 with pBXMCS-2                 | This work                 |
| SS263                | CB15N $\Delta$ stpD P <sub>xyi</sub> ::P <sub>xyi</sub> -stpC-mcherry                | Transformation of SS252 with pSS204                   | This work                 |
| SS264                | CB15N $\Delta$ stpB P <sub>xyi</sub> ::P <sub>xyi</sub> -stpD-gfp                    | Transformation of SW50 with pSS202                    | This work                 |
| SS265                | CB15N $\Delta$ stpB P <sub>xyi</sub> ::P <sub>xyi</sub> -stpC-mcherry                | Transformation of SW50 with pSS204                    | This work                 |
| SS269                | CB15N stpD::stpD-gfp pP <sub>xyi</sub> -TATdimer2                                    | Transformation of SS248 with pEJ216                   | This work                 |
| SS272                | CB15N $\Delta$ stpAB P <sub>xyi</sub> ::P <sub>xyi</sub> -gspG-mcherry               | Transformation of SW51 with pJK86                     | This work                 |
| SS273                | CB15N $\Delta$ bla P <sub>xyi</sub> ::P <sub>xyi</sub> -stpC-blaM                    | Transformation of CS606 with pSS220                   | This work                 |
| SS274                | CB15N $\Delta$ bla P <sub>xyi</sub> ::P <sub>xyi</sub> -stpD-blaM                    | Transformation of CS606 with pSS221                   | This work                 |
| SS277                | CB15N stpD::stpD-gfp P <sub>xyi</sub> ::P <sub>xyi</sub> -gspG-mcherry               | Transformation of SS248 with pJK86                    | This work                 |
| SS281                | CB15N $\Delta$ bacAB P <sub>xyi</sub> ::P <sub>xyi</sub> -stpB-mcherry               | Transformation of JK5 with pSW32                      | This work                 |
| SS283                | CB15N stpD::stpD-gfp P <sub>xyi</sub> ::P <sub>xyi</sub> -elpS-mcherry               | Transformation of SS248 with pSW67                    | This work                 |
| SS284                | CB15N $\Delta$ stpAB P <sub>xyi</sub> ::P <sub>xyi</sub> -elpS-mcherry               | Transformation of SW51 with pSW67                     | This work                 |
| SS292                | CB15N popZ:: $\Omega$ P <sub>xyi</sub> ::P <sub>xyi</sub> -stpB-mcherry              | Transformation of GB255 with pSW32                    | This work                 |
| SS294                | CB15N $\Delta$ stpAB P <sub>xyi</sub> ::P <sub>xyi</sub> -malA-mcherry               | Transformation of SW51 with pSS227                    | This work                 |

**Table S1. Strains Used in This Study (continued)**

| Name                  | Relevant Genotype/Description                                                         | Construction                                  | Reference/Source     |
|-----------------------|---------------------------------------------------------------------------------------|-----------------------------------------------|----------------------|
| SS297                 | CB15N <i>stpD::stpD-gfp</i> P <sub>xyl</sub> ::P <sub>xyl</sub> - <i>malA-mcherry</i> | Transformation of SS248 with pSS227           | This work            |
| SS299                 | CB15N <i>stpD::stpD-gfp</i> P <sub>xyl</sub> ::P <sub>xyl</sub> - <i>pstS-mcherry</i> | Transformation of SS248 with pJK101           | This work            |
| SS302                 | CB15N $\Delta$ <i>stpAB</i> P <sub>xyl</sub> ::P <sub>xyl</sub> - <i>pstS-mcherry</i> | Transformation of SW51 with pJK101            | This work            |
| SS304                 | CB15N $\Delta$ <i>stpCD</i> pP <sub>xyl</sub> - <i>TAT-dimer2</i>                     | Transformation of SS250 with pEJ216           | This work            |
| SS388                 | CB15N <i>stpD::stpD-gfp stpB::stpB-mcherry</i>                                        | Transformation of SS160 with pSS205           | This work            |
| SS389                 | CB15N <i>stpD::stpD-gfp stpC::stpC-mcherry</i>                                        | Transformation of SS248 with pSS310           | This work            |
| SS412                 | CB15N <i>stpB::stpB-mcherry</i>                                                       | Transformation of CB15N with pSS309           | This work            |
| SS413                 | CB15N <i>stpC::stpC-mcherry</i>                                                       | Transformation of CB15N with pSS310           | This work            |
| SS414                 | CB15N $\Delta$ <i>stpA stpB::stpB-mcherry</i>                                         | Transformation of SW49 with pSS309            | This work            |
| SS415                 | CB15N $\Delta$ <i>stpAB stpC::stpC-mcherry</i>                                        | Transformation of SW51 with pSS310            | This work            |
| SW30                  | CB15N P <sub>xyl</sub> ::P <sub>xyl</sub> - <i>stpB-mcherry</i>                       | Transformation of CB15N with pSW32            | This work            |
| SW33                  | CB15N P <sub>xyl</sub> ::P <sub>xyl</sub> - <i>stpA-mcherry</i>                       | Transformation of CB15N with pSW35            | This work            |
| SW49                  | CB15N $\Delta$ <i>stpA</i>                                                            | Gene replacement in CB15N using pSW51         | This work            |
| SW50                  | CB15N $\Delta$ <i>stpB</i>                                                            | Gene replacement in CB15N using pSW52         | This work            |
| SW51                  | CB15N $\Delta$ <i>stpAB</i>                                                           | Gene replacement in CB15N using pSW53         | This work            |
| YB1585                | CB15N <i>ftsZ::P<sub>xyl</sub>-ftsZ</i>                                               |                                               | Wang et al., 2001    |
| YB2811                | NY111d1 <i>pstS::miniTn5LacZ</i>                                                      |                                               | Ireland et al., 2002 |
| YB3202                | CB15N <i>divJ::<math>\Omega</math></i>                                                |                                               | Pierce et al., 2006  |
| YB5058                | CB15N <i>stpX::StpX-gfp</i> P <sub>xyl</sub> ::P <sub>xyl</sub> - <i>stpB-mCherry</i> | Transduction of spec <sup>R</sup> from PV5064 | This work            |
| YB5059                | CB15N $\Delta$ <i>stpAB stpX::stpX-gfp</i>                                            | Transduction of spec <sup>R</sup> from PV5064 | This work            |
| YB5231                | CB15N $\Delta$ <i>stpX</i>                                                            |                                               | Hughes et al., 2010  |
| <b>A. excentricus</b> |                                                                                       |                                               |                      |
| CB48                  | Wild-type strain                                                                      |                                               | Poindexter, 1964     |
| SS309                 | CB48 <i>Astex_0987::Astex_0987-mcherry</i>                                            | Transformation of CB48 with pSS229            | This work            |
| <b>E. coli</b>        |                                                                                       |                                               |                      |
| TOP10                 | General cloning strain                                                                |                                               | Invitrogen           |

**Table S2. General Plasmids Used in This Study, Related to Experimental Procedures**

| Name     | Description                                                                                                                                                  | Reference/Source          |
|----------|--------------------------------------------------------------------------------------------------------------------------------------------------------------|---------------------------|
| pBXMCS-2 | Replicating plasmid for the inducible overexpression of genes in CB15N, Kan <sup>R</sup>                                                                     | Thanbichler et al., 2007  |
| pCHYC-1  | Plasmid for integrating genes encoding C-terminal fusions to the red fluorescent protein mCherry at the native gene locus, Spec/Str <sup>R</sup>             | Thanbichler et al., 2007  |
| pEJ216   | Replicating plasmid carrying TAT-dimer2 under control of P <sub>xyl</sub> , Cam <sup>R</sup>                                                                 | Judd et al., 2005         |
| pJAMY31  | Kan <sup>R</sup> ColE1 replicon, $\beta$ -lactamase translational fusion vector                                                                              | Alley, M. R. K. (unpubl.) |
| pNPTS138 | <i>sacB</i> -containing suicide vector used for double homologous recombination, Kan <sup>R</sup>                                                            | Alley, M. R. K. (unpubl.) |
| pTCYC-2  | Plasmid for integrating C-terminal fusions to the tetracycline tag at the native gene locus, Spec/Str <sup>R</sup>                                           | Thanbichler et al., 2007  |
| pVCHYC-1 | Plasmid for integrating genes encoding C-terminal fusions to the red fluorescent protein mCherry at the chromosomal <i>vanA</i> locus, Spec/Str <sup>R</sup> | Thanbichler et al., 2007  |
| pXCHYC-2 | Plasmid for integrating genes encoding C-terminal fusions to the red fluorescent protein mCherry at the chromosomal <i>xylX</i> locus, Kan <sup>R</sup>      | Thanbichler et al., 2007  |
| pXCHYC-5 | Plasmid for integrating genes encoding C-terminal fusions to the red fluorescent protein mCherry at the chromosomal <i>xylX</i> locus, Tet <sup>R</sup>      | Thanbichler et al., 2007  |
| pXCHYN-5 | Plasmid for integrating genes encoding N-terminal fusions to the red fluorescent protein mCherry at the chromosomal <i>xylX</i> locus, Tet <sup>R</sup>      | Thanbichler et al., 2007  |
| pXGFPC-2 | Plasmid for integrating genes encoding C-terminal fusions to the green fluorescent protein GFP at the chromosomal <i>xylX</i> locus, Kan <sup>R</sup>        | Thanbichler et al., 2007  |
| pXYFPC-5 | Plasmid for integrating genes encoding C-terminal fusions to the yellow fluorescent protein eYFP at the chromosomal <i>xylX</i> locus, Tet <sup>R</sup>      | Thanbichler et al., 2007  |
| pXYFPN-5 | Plasmid for integrating genes encoding N-terminal fusions to the yellow fluorescent protein eYFP at the chromosomal <i>xylX</i> locus, Tet <sup>R</sup>      | Thanbichler et al., 2007  |

**Table S3. Plasmids Generated in This Study, Related to Experimental Procedures**

| <b>Name</b> | <b>Description</b>                                                               | <b>Construction</b>                                                                                                                                                                                                                                                                                                                                                                                   |
|-------------|----------------------------------------------------------------------------------|-------------------------------------------------------------------------------------------------------------------------------------------------------------------------------------------------------------------------------------------------------------------------------------------------------------------------------------------------------------------------------------------------------|
| pEK301      | pXCHYC-2 carrying <i>pstS</i>                                                    | a) amplification of the <i>pstS</i> gene using primers EK225/EK226, followed by restriction with NdeI and EcoRI<br>b) ligation of the digested PCR product into pXCHYC-2 cut with NdeI and EcoRI                                                                                                                                                                                                      |
| pJK86       | pXCHYC-2 carrying <i>gspG</i> (CCNA_00175)                                       | a) amplification of <i>gspS</i> from genomic DNA using primers CC0176-NdeI-for/CC0176-EcoRI-rev, followed by restriction with NdeI and EcoRI<br>b) ligation of the digested PCR product into pXCHYC-2 cut with NdeI and EcoRI                                                                                                                                                                         |
| pJK101      | pXCHYC-2 carrying <i>pstS</i>                                                    | a) amplification of <i>pstS</i> from genomic DNA using primers pstS-for/pstS-rev-EcoRI, followed by restriction with NdeI and EcoRI<br>b) ligation of the digested PCR product into pXCHYC-2 cut with NdeI and EcoRI                                                                                                                                                                                  |
| pSS98       | pSW32 carrying <i>stpB</i> downstream region                                     | a) amplification of the <i>stpB</i> downstream sequence from genomic DNA using primers CC2476-1/-2, followed by restriction with BsrGI and NheI<br>b) ligation into pSW32 cut with BsrGI and NheI                                                                                                                                                                                                     |
| pSS109      | pNTPS138-based plasmid for replacing native <i>stpB</i> with <i>stpB-mcherry</i> | a) isolation of <i>stpB-mcherry</i> from pSS98 by restriction with NdeI and NheI, followed by blunting of the fragment with T4 DNA polymerase<br>b) ligation into pNTPS138 cut with EcoRV                                                                                                                                                                                                             |
| pSS119      | pXBlaMC-2 carrying <i>stpB</i>                                                   | a) isolation of <i>stpB</i> from pSW32 by restriction with NdeI and EcoRI<br>b) ligation into pXBlaMC-2 cut with NdeI and EcoRI                                                                                                                                                                                                                                                                       |
| pSS120      | pXBlaMC-2 carrying <i>stpA</i>                                                   | a) isolation of <i>stpA</i> from pSW35 by restriction with NdeI and EcoRI<br>b) ligation into pXBlaMC-2 cut with NdeI and EcoRI                                                                                                                                                                                                                                                                       |
| pSS123      | pTCYC-2 carrying <i>stpB</i>                                                     | a) isolation of <i>stpB</i> from pSW32 by restriction with NdeI and EcoRI<br>b) ligation into pTCYC-2 cut with NdeI and EcoRI                                                                                                                                                                                                                                                                         |
| pSS142      | pVCHYC-1 carrying <i>stpB</i>                                                    | a) isolation of <i>stpB</i> from pSW32 by restriction with NdeI and EcoRI<br>b) ligation into pVCHYC-1 cut with NdeI and EcoRI                                                                                                                                                                                                                                                                        |
| pSS187      | pTCYC-2-based plasmid carrying <i>stpB-His</i>                                   | a) in-vitro assembly of a phosphorylated His <sub>10</sub> -linker from AM_299f/AM_300r<br>b) ligation into pSS123 cut with EcoRI                                                                                                                                                                                                                                                                     |
| pSS202      | pXGFPC-2 carrying <i>stpD</i>                                                    | a) amplification of <i>stpD</i> from genomic DNA using primers CCNA_2271-for/-rev, followed by restriction with NdeI and SacI<br>b) ligation of the digested PCR product into pXGFPC-2 cut with NdeI and SacI                                                                                                                                                                                         |
| pSS204      | pXCHYC-2 carrying <i>stpC</i>                                                    | a) amplification of <i>stpC</i> from genomic DNA using primers CCNA_02560-for/-rev, followed by restriction with NdeI and SacI<br>b) ligation of the digested PCR product into pXCHYC-2 cut with NdeI and SacI                                                                                                                                                                                        |
| pSS205      | pGFPC-1 carrying <i>stpD</i>                                                     | a) isolation of <i>stpD</i> from pSS202 by restriction with NdeI and EcoRI<br>b) ligation into pGFPC-1 cut with NdeI and EcoRI                                                                                                                                                                                                                                                                        |
| pSS206      | pTCYC-2-based plasmid carrying <i>stpD-His</i>                                   | a) isolation of <i>stpD</i> from pSS202 by restriction with NdeI and EcoRI<br>b) ligation into pSS187 cut with NdeI and EcoRI                                                                                                                                                                                                                                                                         |
| pSS208      | pNTPS138-based plasmid for constructing an in-frame deletion in <i>stpD</i>      | a) amplification of the <i>stpD</i> 5' region from genomic DNA using primers CCNA_02271-3/-4<br>b) amplification of the <i>stpD</i> 3' region from genomic DNA using primers CCNA_02271-5/-6<br>c) overlap extension PCR using both PCR products and primers CCNA_02271-3/-6, followed by restriction with HindIII and EcoRI<br>c) ligation of the final PCR fragment into HindIII/EcoRI-cut pNTPS138 |
| pSS209      | pNTPS138-based plasmid for constructing an in-frame deletion in <i>stpC</i>      | a) amplification of the <i>stpC</i> 5' region from genomic DNA using primers CCNA_02560-3/-4<br>b) amplification of the <i>stpC</i> 3' region from genomic DNA using primers CCNA_02560-5/-6<br>c) overlap extension PCR using both PCR products and primers CCNA_02560-3/-6, followed by restriction with HindIII and EcoRI<br>c) ligation of the final PCR fragment into HindIII/EcoRI-cut pNTPS138 |
| pSS210      | pTCYC-2-based plasmid carrying <i>stpC-His</i>                                   | a) isolation of <i>stpC</i> from pSS204 by restriction with NdeI and EcoRI<br>b) ligation into pSS187 cut with NdeI and EcoRI                                                                                                                                                                                                                                                                         |
| pSS220      | pXBlaMC-2 carrying <i>stpC</i>                                                   | a) isolation of <i>stpC</i> from pSS204 by restriction with NdeI and EcoRI<br>b) ligation into pXBlaMC-2 cut with NdeI and EcoRI                                                                                                                                                                                                                                                                      |
| pSS221      | pXBlaMC-2 carrying <i>stpD</i>                                                   | a) isolation of <i>stpD</i> from pSS202 by restriction with NdeI and EcoRI<br>b) ligation into pXBlaMC-2 cut with NdeI and EcoRI                                                                                                                                                                                                                                                                      |
| pSS227      | pXCHYC-2 carrying <i>malA</i> (CCNA_02370)                                       | a) amplification of <i>malA</i> from genomic DNA using primers CC2287-1/-2, followed by restriction with NdeI and SacI<br>b) ligation of the digested PCR product into pXCHYC-2 cut with NdeI and SacI                                                                                                                                                                                                |
| pSS229      | pCHYC-2 carrying <i>Astex_0987</i>                                               | a) amplification of <i>Astex_0987</i> from genomic DNA using primers Astex_0987-2f/-3r, followed by restriction with NdeI and EcoRI<br>b) ligation of the digested PCR product into pCHYC-2 cut with NdeI and EcoRI                                                                                                                                                                                   |
| pSS309      | pCHYC-2 carrying <i>stpB</i>                                                     | a) isolation of <i>stpB</i> from pSW32 by restriction with NdeI and EcoRI<br>b) ligation into pXCHYC-2 cut with NdeI and EcoRI                                                                                                                                                                                                                                                                        |
| pSS310      | pCHYC-2 carrying <i>stpC</i>                                                     | a) isolation of <i>stpC</i> from pSS204 by restriction with NdeI and EcoRI<br>b) ligation into pXCHYC-2 cut with NdeI and EcoRI                                                                                                                                                                                                                                                                       |

**Table S3. Plasmids Generated in This Study (continued)**

| Name                                      | Description                                                                                                                               | Construction                                                                                                                                                                                                                                                                                                                                                                                                                                                 |
|-------------------------------------------|-------------------------------------------------------------------------------------------------------------------------------------------|--------------------------------------------------------------------------------------------------------------------------------------------------------------------------------------------------------------------------------------------------------------------------------------------------------------------------------------------------------------------------------------------------------------------------------------------------------------|
| pSW32                                     | pXCHYC-2 carrying <i>stpB</i>                                                                                                             | a) amplification of the <i>stpB</i> gene using primers CC2476-for/CC2476-rev, followed by restriction with NdeI and EcoRI                                                                                                                                                                                                                                                                                                                                    |
| pSW35                                     | pXCHYC-2 carrying <i>stpA</i>                                                                                                             | b) ligation of the digested PCR products into pXCHYC-2 cut with NdeI and EcoRI<br>a) amplification of the <i>stpA</i> gene using primers CC2477-uni/CC2477-rev, followed by restriction with NdeI and SacI                                                                                                                                                                                                                                                   |
| pSW51                                     | pNTPS138-based plasmid for constructing an in-frame deletion in <i>stpA</i>                                                               | b) ligation of the digested PCR products into pXCHYC-2 cut with NdeI and SacRI<br>a) amplification of the 5' region of <i>stpA</i> from genomic DNA using primers dCC2477-A-for/dCC2477-B-rev, followed by restriction with BamHI and EcoRI                                                                                                                                                                                                                  |
| pSW52                                     | pNTPS138-based plasmid for constructing an in-frame deletion in <i>stpB</i>                                                               | b) amplification of the 3' region of <i>stpA</i> from genomic DNA using primers dCC2477-C-for/dCC2477-D-rev, followed by restriction with EcoRI and NheI<br>c) ligation of both fragments into BamHI/NheI-cut pNTPS138                                                                                                                                                                                                                                       |
| pSW53                                     | pNTPS138-based plasmid for constructing an in-frame deletion in <i>stpAB</i>                                                              | a) amplification of the 5' region of <i>stpB</i> from genomic DNA using primers dCC2476-A-for/dCC2476-B-rev, followed by restriction with BamHI and EcoRI<br>b) amplification of the 3' region of <i>stpB</i> from genomic DNA using primers dCC2476-C-for/dCC2476-D-rev, followed by restriction with EcoRI and NheI<br>c) ligation of both fragments into BamHI/NheI-cut pNTPS138                                                                          |
| pSW64<br>( <i>P<sub>xyI</sub>-stpAB</i> ) | pBXMCS-2 carrying <i>stpAB</i>                                                                                                            | a) amplification of the 5' region of <i>stpAB</i> from genomic DNA using primers d2476d2477-A-for/d2476d2477-B-rev, followed by restriction with BamHI and EcoRI<br>b) amplification of the 3' region of <i>stpB</i> from genomic DNA using primers d2476d2477-C-for/ d2476d2477-D-rev, followed by restriction with EcoRI and NheI<br>c) ligation of both fragments into BamHI/NheI-cut pNTPS138                                                            |
| pSW67                                     | pXCHYC-2 carrying <i>elpS</i> (CCNA_00169)                                                                                                | a) amplification of <i>stpAB</i> from genomic DNA using primers CC2477-uni/CC2476-rev2St, followed by restriction with NdeI and EcoRI<br>b) ligation of the digested PCR product into pBXMCS-2 cut with NdeI and EcoRI                                                                                                                                                                                                                                       |
| pXBlaMC-2                                 | Plasmid for integrating genes encoding C-terminal TEM-1 $\beta$ -lactamase fusions at the chromosomal <i>xylX</i> locus, Kan <sup>R</sup> | a) amplification of <i>elpS</i> from genomic DNA using primers CC0170-C-for/CC0170-C-rev, followed by restriction with NdeI and EcoRI<br>b) ligation of the digested PCR product into pXCHYC-2 cut with NdeI and EcoRI<br>a) amplification of the TEM-1 $\beta$ -lactamase gene from pJAMY31 using primers blaM-C_for/blaM-C_rev, followed by restriction with AgeI and NheI<br>b) ligation of the digested PCR product into pXGFPC-2 cut with AgeI and NheI |

**Table S4. Oligonucleotides Used in This Study, Related to Experimental Procedures**

Note the different ORF numbers: CC2477 = CCNA\_02562, CC2476 = CCNA\_02561, CC0170 = CCNA\_00169, CC0176 = CCNA\_00175, CC2287=CCNA\_02370.

| Oligonucleotide  | Sequence                                          |
|------------------|---------------------------------------------------|
| AM_299f          | AATCCCATCACCACCATCATCACCATCACCACCCTAGT            |
| AM_300r          | GGGTAGTGGTGGTAGTAGTGGTAGTGGTGGTGGTATCATTAA        |
| Astex_0987-2f    | ATTAATTCATATGTCGGCCAGACAGAAACCCGCTATG             |
| Astex_0987-3r    | ATGAATTCGATTCGAGGCGACCCAGACGACGCGG                |
| blaM-C_for       | TTTTACCGGTCGGCCACCATGCACCCAGAAACGCTGGTAAAAGTAAAAG |
| blaM-C_rev       | TTTTGCTAGCTTACCAATGCTTAATCAGTGAGGCACCTATC         |
| CCNA_02271-for   | TTAATTCATATGCGTCATCAAATGGCGCGTCGCG                |
| CCNA_02271-rev   | TAGAGCTCCGTGATGGGCGGCGGCGGCTGCTTG                 |
| CCNA_02271-3     | ATGAATTCGAACCAGACGACCTGAAGCGGCGCAG                |
| CCNA_02271-4     | CTTGTCCTTCACGCGACGCGCCATTTGATGAC                  |
| CCNA_02271-5     | CGTCGCGTGAAGGACAAGCACGCCGCCGCCGC                  |
| CCNA_02271-6     | TAAAGCTTCGGCGGTTTCCAGGTGATCGAGCA                  |
| CCNA_02560-for   | TTAATTCATATGAGCAAGTCTGTTTCGTAGCCGGCTGG            |
| CCNA_02560-rev   | TAGAGCTCCGCATCCGACGAGGCCCGCGCCGACG                |
| CCNA_02560-3     | ATGAATTCGAGTCAAGGCGACCGGCACGATCATG                |
| CCNA_02560-4     | GAAATTACGGGAAACGGCCAGCCGGCTACGAAC                 |
| CCNA_02560-5     | GCCGTTTCCCGTAATTTGTCGCGCGGGCCCTC                  |
| CCNA_02560-6     | TAAAGCTTCTACGAGCAGGCGACGAAGCACCCG                 |
| CC0170-C-for     | AATTCATATGAAGCTGTATAGAAACCTAATCCTCATGAGCTGCG      |
| CC0170-C-rev     | AATTGAATTCGTTGGTGGCGCAGCGAGCTG                    |
| CC0176-Ndel-for  | ATATCATATGTCGACCGCAAACGCTGAAACGAAAC               |
| CC0176-EcoRI-rev | ATATGAATTCGCTCCAGTTGCCAATGTCGG                    |
| CC2287-3         | GCCAATGATCGCGTGATCGGGC                            |
| CC2287-4         | CATCCCGCAGGAAGCCATCATCG                           |
| CC2476-for       | TTAACATATGCGCCGCTCAGCCGCTGCTGG                    |
| CC2476-rev       | TAGAATTCGATCGAGGAGCTCCCCCTTGTGAGGC                |
| CC2477-uni       | AAAACATATGCGCGAGGCGGGGACGCAATTGC                  |
| CC2477-rev       | TAGAGCTCCGTAATTCCTTCGTTATACGGACGCCCGC             |
| DCC2476-A-for    | AATTGGATCCTCGGCCGTCGGAACACC                       |
| DCC2476-B-rev    | AATTGAATTCGGCCAAAGCGCCAGC                         |
| DCC2476-C-for    | AATTGAATTCGGTCCGCGCC                              |
| DCC2476-D-rev    | AATTGCTAGCTTGAAGCAGCGGTTGTCGCC                    |
| CC2476-rev2St    | AATTGAATTCATCGAGGAGCTCCCCCTTGT                    |
| CC2476-1         | TATGTACAAGTAAGCAAGTCTGTTCTAGCCGGCTGGC             |
| CC2476-2         | TATAGCTAGCCGACAGCACCGTCTCAGCATCC                  |
| DCC2477-B-rev    | TTAAGAATTCGCGAAGGCGCGCAATT                        |
| DCC2477-C-for    | TTAAGAATTCGATCGGGGCGGGCGT                         |
| DCC2477-D-for    | TTAAGCTAGCACCGGGGCTGGATCTTG                       |
| D2476d4277-A-for | TTAAGGATCCGGAGCTGGCCAATACGGC                      |
| D2476d4277-B-rev | TTAAGAATTCGCGAAGGCGCGCAATTG                       |
| D2476d4277-C-for | TTAAGAATTCGTTCCCGCGCTCAACAAG                      |
| D2476d4277-D-for | TTAAGCTAGCGGGGTGAAGATGCCGAG                       |
| EK225            | TACTCATATGAACAAGCTCATCGGGC                        |
| EK226            | TACTGAATTCGCTTCTCGGCGCCGGCATCGG                   |
| pstS-for         | ATATACATATGAACAAGCTCATCGGCGGGTCCGC                |
| pstS-rev-EcoRI   | ATATGAATTCGCTTCTCGGCGCCGGCATC                     |

## SUPPLEMENTAL REFERENCES

- Bowman, G.R., Comolli, L.R., Zhu, J., Eckart, M., Koenig, M., Downing, K.H., Moerner, W.E., Earnest, T., and Shapiro, L. (2008). A polymeric protein anchors the chromosomal origin/ParB complex at a bacterial cell pole. *Cell* **134**, 945-955.
- Evinger, M. and Agabian, N. (1977) Envelope-associated nucleoid from *Caulobacter crescentus* stalked and swarmer cells. *J Bacteriol* **132**, 294-301.
- Ireland, M.M., Karty, J.A., Quardokus, E.M., Reilly, J.P., and Brun, Y.V. (2002). Proteomic analysis of the *Caulobacter crescentus* stalk indicates competence for nutrient uptake. *Mol Microbiol* **45**, 1029-1041.
- Judd, E.M., Comolli, L.R., Chen, J.C., Downing, K.H., Moerner, W.E., and McAdams, H.H. (2005). Distinct constrictive processes, separated in time and space, divide *caulobacter* inner and outer membranes. *J Bacteriol* **187**, 6874-6882.
- Pierce, D.L., O'Donnol, D.S., Allen, R.C., Javens, J.W., Quardokus, E.M., and Brun, Y.V. (2006) Mutations in DivL and CckA rescue a *divJ* null mutant of *Caulobacter crescentus* by reducing the activity of CtrA. *J Bacteriol* **188**, 2473-2482.
- Poindexter, J.S. (1964). Biological Properties and Classification of the *Caulobacter* Group. *Bacteriol Rev* **28**, 231-295.
- Thanbichler, M., Iniesta, A.A., and Shapiro, L. (2007). A comprehensive set of plasmids for vanillate- and xylose-inducible gene expression in *Caulobacter crescentus*. *Nucleic Acids Res* **35**, e137.
- Wagner. J.K., Setayeshgar, S., Sharon, L.A., Reilly, J.P., and Brun, Y.V. (2006) A nutrient uptake role for bacterial cell envelope extensions. *Proc Natl Acad Sci USA* **103**, 11772-11777.
- Wang, Y., Jones, B.D., and Brun, Y.V. (2001). A set of *ftsZ* mutants blocked at different stages of cell division in *Caulobacter*. *Mol Microbiol* **40**, 347-360.
- Werner, J.N., Chen, E.Y., Guberman, J.M., Zippilli, A.R., Irgon, J.J., and Gitai, Z. (2009) Quantitative genome-scale analysis of protein localization in an asymmetric bacterium. *Proc Natl Acad Sci USA* **106**, 7858-7863.
- West, L., Yang, D., and Stephens, C. (2002) Use of the *Caulobacter crescentus* genome sequence to develop a method for systematic genetic mapping. *J. Bacteriol.* **184**: 2155-2166.
